# Supplementary material for: Cross-Sectional Study of Location-Based Built Environments, Physical Activity, Dietary Intake, and Body Mass Index in Adult Twins
Source: MDPI journal article supplement (doi:10.3390/ijerph20064885), 2023-03-10

**Supplementary Table S1.** Descriptive statistics for proportion of time spent in different neighborhoods, by neighborhood type, among identical twin pairs (*n*=158).

| Neighborhood Type          | GPS Proportion of Time Spent |      |     |      |        |      |     |       |             |      |     |      |        |      |     |      |
|----------------------------|------------------------------|------|-----|------|--------|------|-----|-------|-------------|------|-----|------|--------|------|-----|------|
|                            | Within home                  |      |     |      |        |      |     |       | Out of home |      |     |      |        |      |     |      |
|                            | air1mi                       |      |     |      | net1mi |      |     |       | air1mi      |      |     |      | net1mi |      |     |      |
|                            | M                            | SD   | Min | Max  | M      | SD   | Min | Max   | M           | SD   | Min | Max  | M      | SD   | Min | Max  |
| Car dependent I (0-24)     | 12.2                         | 21.4 | 0.0 | 90.3 | 12.3   | 24.2 | 0.0 | 95.5  | 11.8        | 13.3 | 0.0 | 78.5 | 12.0   | 13.1 | 0.0 | 75.7 |
| Car dependent II (25-49)   | 21.6                         | 24.4 | 0.0 | 96.7 | 22.2   | 27.4 | 0.0 | 96.1  | 19.1        | 14.0 | 0.4 | 88.1 | 19.5   | 14.4 | 0.7 | 87.4 |
| Somewhat walkable (50-69)  | 24.0                         | 23.9 | 0.0 | 98.6 | 21.0   | 25.0 | 0.0 | 99.3  | 21.2        | 13.7 | 1.0 | 84.9 | 20.5   | 12.1 | 1.1 | 72.3 |
| Very walkable (70-89)      | 26.7                         | 28.1 | 0.0 | 86.7 | 27.5   | 30.3 | 0.0 | 90.6  | 25.5        | 15.6 | 1.0 | 77.9 | 25.5   | 15.7 | 1.4 | 78.8 |
| Walker's paradise (90-100) | 15.5                         | 26.7 | 0.0 | 98.9 | 17.0   | 28.6 | 0.0 | 100.0 | 22.4        | 20.6 | 0.0 | 85.3 | 22.5   | 20.7 | 0.0 | 83.4 |

air1m = 1-mile air (Euclidean) buffer type. net1m = 1-mile network buffer type.

Supplementary Figure S1. General study area in Seattle, WA, with inset maps of two illustrative neighborhoods.

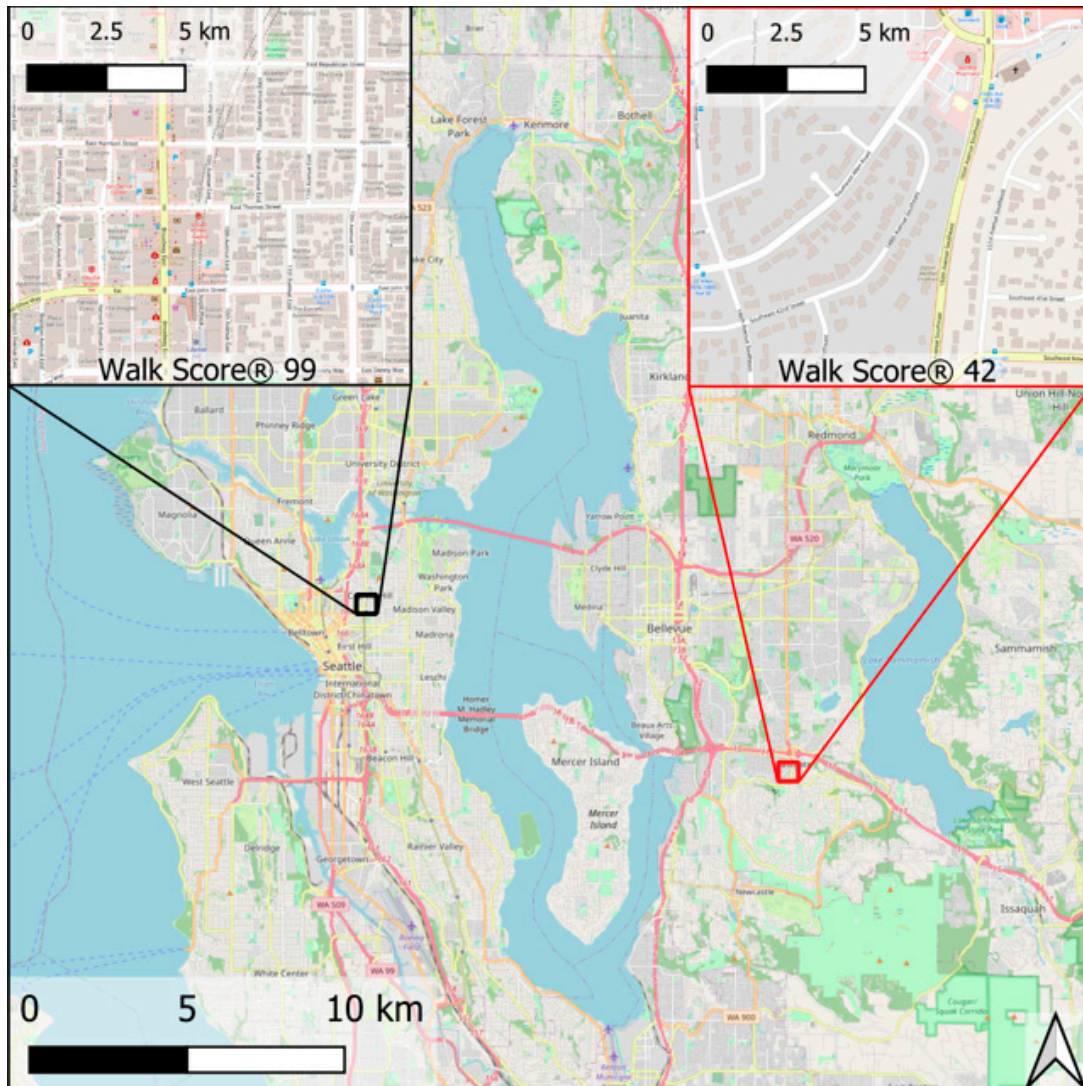

Supplement: s1 [file s1]
